# Supplementary material for: Identifying and Interpreting Traditional Architectural Style Characteristics Based on Deep Learning
Source: Research Square preprint supplement (doi:10.21203/rs.3.rs-7971684/v1), 2025-11-17
Supplement: Supplementary file 1 [file 8c90fa5832d78e08e35f1a9f.docx]

Appendix A. List of CTSs architectural styles. (0-Su, 1-Hui, 2-Jing, 3-Min, 4-Chuan, 5-Jin)

| Style code | Address |
| --- | --- |
| 0-1 | Luxiang Village, Dongshan Town, Wuzhong District, Suzhou City, Jiangsu Province |
| 0-2 | Mingyuewan Village, Jinting Town, Wuzhong District, Suzhou City, Jiangsu Province |
| 0-3 | Lishi Village, Guli Town, Changshu City, Suzhou City, Jiangsu Province |
| 0-4 | Sanshandao Village, Dongshan Town, Wuzhong District, Suzhou City, Jiangsu Province |
| 0-5 | Yangwan Village, Dongshan Town, Wuzhong District, Suzhou City, Jiangsu Province |
| 0-6 | Dongcun Village, Jinting Town, Wuzhong District, Suzhou City, Jiangsu Province |
| 0-7 | Wengxiang Village, Dongshan Town, Wuzhong District, Suzhou City, Jiangsu Province |
| 0-8 | Xiemaqiao Village, Qiandeng Town, Kunshan City, Suzhou City, Jiangsu Province |
| 0-9 | Dongcai Village, Jinting Town, Wuzhong District, Suzhou City, Jiangsu Province |
| 0-10 | Minhe Village, Wuzhen Town, Tongxiang City, Jiaxing City, Zhejiang Province |
| 0-11 | Houbu Village (of Jiangdong Village), Jinting Town, Wuzhong District, Suzhou City, Jiangsu Province |
| 0-12 | Tangli Village, Jinting Town, Wuzhong District, Suzhou City, Jiangsu Province |
| 0-13 | Xigang Village, Pingwang Town, Wujiang District, Suzhou City, Jiangsu Province |
| 0-14 | Yigao Village, Zhili Town, Wuxing District, Huzhou City, Zhejiang Province |
| 0-15 | Qiqiao Village, Qiqiao Town, Gaochun District, Nanjing City, Jiangsu Province |
| 0-16 | Jiaoxi Village, Zhenglu Town, Tianning District, Changzhou City, Jiangsu Province |
| 0-17 | Lishe Village, Yuqi Subdistrict, Huishan District, Wuxi City, Jiangsu Province |
| 0-18 | Gexin Village, Pujiang Town, Minhang District, Shanghai Municipality |
| 0-19 | Mianqing Village, Kangqiao Town, Pudong New Area, Shanghai Municipality |
| 0-20 | Yaluli Village, Jinting Town, Wuzhong District, Suzhou City, Jiangsu Province |
| 0-21 | Zhili Village, Jinting Town, Wuzhong District, Suzhou City, Jiangsu Province |
| 0-22 | Piaomiao Village, Jinting Town, Wuzhong District, Suzhou City, Jiangsu Province |
| 0-23 | Chongshan Village, Guangfu Town, Wuzhong District, Suzhou City, Jiangsu Province |
| 0-24 | Shuangwan Village, Dongshan Town, Wuzhong District, Suzhou City, Jiangsu Province |
| 0-25 | Qianyangliu Village, Hushu Subdistrict, Jiangning District, Nanjing City, Jiangsu Province |
| 0-26 | Yanjiaqiao Village, Yangjian Town, Xishan District, Wuxi City, Jiangsu Province |
| 0-27 | Nanyangqiao Ancient Street Village, Qianhuang Town, Wujin District, Changzhou City, Jiangsu Province |
| 0-28 | Fangzhuang Village, Xushe Town, Yixing City, Wuxi City, Jiangsu Province |
| 0-29 | Zhoushan Village, Xiangshan Subdistrict, Wuzhong District, Suzhou City, Jiangsu Province |
| 0-30 | Jianghang Village, Zhangpu Town, Kunshan City, Suzhou City, Jiangsu Province |
| 0-31 | Fangqiao Village, Fuqiao Town, Taicang City, Suzhou City, Jiangsu Province |
| 0-32 | Sanshi Village, Fuqiao Town, Taicang City, Suzhou City, Jiangsu Province |
| 0-33 | Kaixiangong Village, Qidu Town, Wujiang District, Suzhou City, Jiangsu Province |
| 0-34 | Liyuan Village, Bixi Subdistrict, Changshu City, Suzhou City, Jiangsu Province |
| 0-35 | Jincun Village, Tangqiao Town, Zhangjiagang City, Suzhou City, Jiangsu Province |
| 0-36 | Dongbang Village, Zhouzhuang Town, Kunshan City, Suzhou City, Jiangsu Province |
| 0-37 | Zhubang Village, Jinxi Town, Kunshan City, Suzhou City, Jiangsu Province |
| 0-38 | Wushentan Village, Bacheng Town, Kunshan City, Suzhou City, Jiangsu Province |
| 0-39 | Qiqin Village, Qu'a Subdistrict, Danyang City, Zhenjiang City, Jiangsu Province |
| 0-40 | Yangxi Village, Zhoutie Town, Yixing City, Wuxi City, Jiangsu Province |
| 1-1 | Xidi Village, Xidi Town, Yi County, Huangshan City, Anhui Province |
| 1-2 | Hongcun Village, Hongcun Town, Yi County, Huangshan City, Anhui Province |
| 1-3 | Chengkan Village, Chengkan Town, Huizhou District, Huangshan City, Anhui Province |
| 1-4 | Qiankou Village, Qiankou Town, Huizhou District, Huangshan City, Anhui Province |
| 1-5 | Xucun Village, Xucun Town, She County, Huangshan City, Anhui Province |
| 1-6 | Tangmo Village, Qiankou Town, Huizhou District, Huangshan City, Anhui Province |
| 1-7 | Tangyue Village, Zhengcun Town, She County, Huangshan City, Anhui Province |
| 1-8 | Lucun Village, Hongcun Town, Yi County, Huangshan City, Anhui Province |
| 1-9 | Xixinan Village, Xixinan Town, Huizhou District, Huangshan City, Anhui Province |
| 1-10 | Zhanqi Village, Bei'an Town, She County, Huangshan City, Anhui Province |
| 1-11 | Xiong Village, Xiongcun Township, She County, Huangshan City, Anhui Province |
| 1-12 | Wan'an Old Street, Wan'an Town, Xiuning County, Huangshan City, Anhui Province |
| 1-13 | Jiangwan Village, Jiangwan Town, Wuyuan County, Shangrao City, Jiangxi Province |
| 1-14 | Bishan Village, Biyang Town, Yi County, Huangshan City, Anhui Province |
| 1-15 | Yuliang Village, Huicheng Town, She County, Huangshan City, Anhui Province |
| 1-16 | Nanping Village, Biyang Town, Yi County, Huangshan City, Anhui Province |
| 1-17 | Guocun Village, Jiaocun Town, Huangshan District, Huangshan City, Anhui Province |
| 1-18 | Zhaji Village, Taohuatan Town, Jing County, Xuancheng City, Anhui Province |
| 1-19 | Lingshan Village, Chengkan Town, Huizhou District, Huangshan City, Anhui Province |
| 1-20 | Longchuan Village, Yingzhou Town, Jixi County, Xuancheng City, Anhui Province |
| 1-21 | Shang Village, Jiapeng Township, Jixi County, Xuancheng City, Anhui Province |
| 1-22 | Zuyuan Village, Xikou Town, Xiuning County, Huangshan City, Anhui Province |
| 1-23 | Lingjiao Village, Wangcun Town, Xiuning County, Huangshan City, Anhui Province |
| 1-24 | Shiwukeng Village, Wangcun Town, Xiuning County, Huangshan City, Anhui Province |
| 1-25 | Xiangshan Village, Baiji Township, Xiuning County, Huangshan City, Anhui Province |
| 1-26 | Qiling Village, Rongkou Township, Qimen County, Huangshan City, Anhui Province |
| 1-27 | Su Village, Qizili Town, She County, Huangshan City, Anhui Province |
| 1-28 | Tanpei Village, Qizili Town, She County, Huangshan City, Anhui Province |
| 1-29 | Lushan Village, Chakou Town, She County, Huangshan City, Anhui Province |
| 1-30 | Rouchuan Village, Kengkou Township, She County, Huangshan City, Anhui Province |
| 1-31 | Huang Village, Shangshan Town, Xiuning County, Huangshan City, Anhui Province |
| 1-32 | Guanlu Village, Biyang Town, Yi County, Huangshan City, Anhui Province |
| 1-33 | Shuichuan Village, Xiakeng Town, She County, Huangshan City, Anhui Province |
| 1-34 | Huaitang Village, Bei'an Town, She County, Huangshan City, Anhui Province |
| 1-35 | Pingshan Village, Hongcun Town, Yi County, Huangshan City, Anhui Province |
| 1-36 | Kengkou Village, Shanli Town, Qimen County, Huangshan City, Anhui Province |
| 1-37 | Gaoshan Village, Bei'an Town, She County, Huangshan City, Anhui Province |
| 1-38 | Renli Village, Fuyang Town, She County, Huangshan City, Anhui Province |
| 1-39 | Choushu Village, Zhengcun Town, She County, Huangshan City, Anhui Province |
| 1-40 | Maihuayu Village, Xiongcun Township, She County, Huangshan City, Anhui Province |
| 2-1 | Shuiyu Village, Nanjiao Township, Fangshan District, Beijing Municipality |
| 2-2 | Liuliqü Village, Longquan Subdistrict Office, Mentougou District, Beijing Municipality |
| 2-3 | Dongshiguyan Village, Wangping Town, Mentougou District, Beijing Municipality |
| 2-4 | Weizishui Village, Yanchi Town, Mentougou District, Beijing Municipality |
| 2-5 | Cuandixia Village, Zhaitang Town, Mentougou District, Beijing Municipality |
| 2-6 | Huanglingxi Village, Zhaitang Town, Mentougou District, Beijing Municipality |
| 2-7 | Lingshui Village, Zhaitang Town, Mentougou District, Beijing Municipality |
| 2-8 | Malan Village, Zhaitang Town, Mentougou District, Beijing Municipality |
| 2-9 | Gubeikou Village, Gubeikou Town, Miyun District, Beijing Municipality |
| 2-10 | Jiaozhuanghu Village, Longwantun Town, Shunyi District, Beijing Municipality |
| 2-11 | Chadao Village, Badaling Town, Yanqing District, Beijing Municipality |
| 2-12 | Beijiabi Village, Beijiabi Township, Ci County, Handan City, Hebei Province |
| 2-13 | Chi'an Village, Henandian Town, She County, Handan City, Hebei Province |
| 2-14 | Piancheng Village, Piancheng Town, She County, Handan City, Hebei Province |
| 2-15 | Baifu Village, Yicheng Town, Wu'an City, Handan City, Hebei Province |
| 2-16 | Xiaolongwo Village, Tianchang Town, Jingxing County, Shijiazhuang City, Hebei Province |
| 2-17 | Daliangjiang Village, Nanzhangcheng Town, Jingxing County, Shijiazhuang City, Hebei Province |
| 2-18 | Songgucheng Village, Tianchang Town, Jingxing County, Shijiazhuang City, Hebei Province |
| 2-19 | Xigubao Village, Nuanquan Town, Yu County, Zhangjiakou City, Hebei Province |
| 2-20 | Shangsuzhuang Village, Songjiazhuang Town, Yu County, Zhangjiakou City, Hebei Province |
| 2-21 | Beifangcheng Village, Yongquanzhuang Township, Yu County, Zhangjiakou City, Hebei Province |
| 2-22 | Cheng Village, Hedi Town, Luoning County, Luoyang City, Henan Province |
| 2-23 | Dongliuquan Village, Yucheng Town, Boshan District, Zibo City, Shandong Province |
| 2-24 | Guanqianhouxu Village, Huangshanguan Town, Longkou City, Yantai City, Shandong Province |
| 2-25 | Lijiatuan Village, Wangcun Town, Zhoucun District, Zibo City, Shandong Province |
| 2-26 | Yuanjia Village, Yanxia Town, Liquan County, Xianyang City, Shaanxi Province |
| 2-27 | Dangjia Village, Xizhuang Town, Hancheng City, Weinan City, Shaanxi Province |
| 2-28 | Shangzhuang Village, Runcheng Town, Yangcheng County, Jincheng City, Shanxi Province |
| 2-29 | Sigouhui Village, Dajian Township, Kelan County, Xinzhou City, Shanxi Province |
| 2-30 | Beixinwu Village, Yi'an Town, Jiexiu City, Jinzhong City, Shanxi Province |
| 2-31 | Ding Village, Xiangfen New Town, Linfen City, Shanxi Province |
| 2-32 | Sanjiadian Village, Longquan Subdistrict Office, Mentougou District, Beijing Municipality |
| 2-33 | Hexi Village, Gubeikou Town, Miyun County, Beijing Municipality |
| 2-34 | Nanjiao Village, Nanjiao Township, Fangshan District, Beijing Municipality |
| 2-35 | Xiaodianhe Village, Shibaotou Township, Weihui City, Xinxiang City, Henan Province |
| 2-36 | Mengquan Village, Taihe Town, Zichuan District, Zibo City, Shandong Province |
| 2-37 | Dalaowa Village, Xinzhuang Town, Zhaoyuan City, Yantai City, Shandong Province |
| 2-38 | Menggezhuang Village, Xinzhuang Town, Zhaoyuan City, Yantai City, Shandong Province |
| 2-39 | Xujia Village, Zhangxing Town, Zhaoyuan City, Yantai City, Shandong Province |
| 2-40 | Shangge Village, Shangge Town, Luoning County, Luoyang City, Henan Province |
| 3-1 | Zhongxin Village, Shizhong Town, Xinluo District, Longyan City, Fujian Province |
| 3-2 | Yantai Village, Chendong Township, Yongding District, Longyan City, Fujian Province |
| 3-3 | Tianluokeng Village, Shuyang Town, Nanjing County, Zhangzhou City, Fujian Province |
| 3-4 | Zhuangshang Village, Daxi Town, Pinghe County, Zhangzhou City, Fujian Province |
| 3-5 | Hongkeng Village, Hukeng Town, Yongding District, Longyan City, Fujian Province |
| 3-6 | Zhongteng Village, Xiazai Town, Pinghe County, Zhangzhou City, Fujian Province |
| 3-7 | Luxi Village, Luxi Town, Pinghe County, Zhangzhou City, Fujian Province |
| 3-8 | Xinnan Village, Hukeng Town, Yongding District, Longyan City, Fujian Province |
| 3-9 | Shiqiao Village, Shuyang Town, Nanjing County, Zhangzhou City, Fujian Province |
| 3-10 | Zhongchuan Village, Xiayang Town, Yongding District, Longyan City, Fujian Province |
| 3-11 | Gaobei Village, Gaotou Township, Yongding County, Longyan City, Fujian Province |
| 3-12 | Nanjiang Village, Hukeng Town, Yongding County, Longyan City, Fujian Province |
| 3-13 | Futang Village, Xiufeng Township, Pinghe County, Zhangzhou City, Fujian Province |
| 3-14 | Chuxi Village, Xiayang Town, Yongding County, Longyan City, Fujian Province |
| 3-15 | Nanyan Village, Xiping Town, Anxi County, Quanzhou City, Fujian Province |
| 3-16 | Xiayong Village, Jinshan Town, Nanjing County, Zhangzhou City, Fujian Province |
| 3-17 | Shangyang Village, Kuiyang Town, Nanjing County, Zhangzhou City, Fujian Province |
| 3-18 | Pushan Village, Meilin Town, Nanjing County, Zhangzhou City, Fujian Province |
| 3-19 | Qitou Village, Meilin Town, Nanjing County, Zhangzhou City, Fujian Province |
| 3-20 | Hekeng Village, Shuyang Town, Nanjing County, Zhangzhou City, Fujian Province |
| 3-21 | Xipian Village, Hukeng Town, Yongding District, Longyan City, Fujian Province |
| 3-22 | Kengtou Village, Daxi Township, Yongding District, Longyan City, Fujian Province |
| 3-23 | Sanlian Village, Xiayang Town, Yongding District, Longyan City, Fujian Province |
| 3-24 | Shijia Village, Hukeng Town, Yongding County, Longyan City, Fujian Province |
| 3-25 | Dade Village, Guzhu Township, Yongding District, Longyan City, Fujian Province |
| 3-26 | Nanzhong Village, Hukeng Town, Yongding District, Longyan City, Fujian Province |
| 3-27 | Bayi Village, Xiaotao Town, Yong'an City, Sanming City, Fujian Province |
| 3-28 | Shanhe Village, Xitan Township, Zhao'an County, Zhangzhou City, Fujian Province |
| 3-29 | Hechun Village, Makeng Township, Hua'an County, Zhangzhou City, Fujian Province |
| 3-30 | Taxia Village, Shuyang Town, Nanjing County, Zhangzhou City, Fujian Province |
| 3-31 | Nan'ou Village, Shuyang Town, Nanjing County, Zhangzhou City, Fujian Province |
| 3-32 | Hongxia Village, Guanxun Town, Zhangpu County, Zhangzhou City, Fujian Province |
| 3-33 | Linzhong Village, Hexi Town, Nanjing County, Zhangzhou City, Fujian Province |
| 3-34 | Linban Village, Hexi Town, Nanjing County, Zhangzhou City, Fujian Province |
| 3-35 | Luokeng Village, Kuiyang Town, Nanjing County, Zhangzhou City, Fujian Province |
| 3-36 | Meilin Village, Meilin Town, Nanjing County, Zhangzhou City, Fujian Province |
| 3-37 | Kengtou Village, Chuanchang Town, Nanjing County, Zhangzhou City, Fujian Province |
| 3-38 | Gezhu Village, Nankeng Town, Nanjing County, Zhangzhou City, Fujian Province |
| 3-39 | Ganfang Village, Chuanchang Town, Nanjing County, Zhangzhou City, Fujian Province |
| 3-40 | Xialing Village, Chuanchang Town, Nanjing County, Zhangzhou City, Fujian Province |
| 4-1 | Wangyu Village, Wangyu Township, Yucheng District, Ya'an City, Sichuan Province |
| 4-2 | Hongxing Village, Liujiang Town, Hongya County, Meishan City, Sichuan Province |
| 4-3 | Nanhua Village, Sankeshu Town, Kaili City, Qiandongnan Miao and Dong Autonomous Prefecture, Guizhou Province |
| 4-4 | Jincheng Village, Leidong Township, Liping County, Qiandongnan Miao and Dong Autonomous Prefecture, Guizhou Province |
| 4-5 | Tang'an Village, Zhaoxing Town, Liping County, Qiandongnan Miao and Dong Autonomous Prefecture, Guizhou Province |
| 4-6 | Zhaoxing Village, Zhaoxing Town, Liping County, Qiandongnan Miao and Dong Autonomous Prefecture, Guizhou Province |
| 4-7 | Changtan Village, Laotun Township, Taijiang County, Qiandongnan Miao and Dong Autonomous Prefecture, Guizhou Province |
| 4-8 | Jitangshangzhai Village, Zhaoxing Town, Liping County, Qiandongnan Miao and Dong Autonomous Prefecture, Guizhou Province |
| 4-9 | Yanban Village, Nangong Town, Taijiang County, Qiandongnan Miao and Dong Autonomous Prefecture, Guizhou Province |
| 4-10 | Zenlei Village, Dujiang Town, Sandu Shui Autonomous County, Qiannan Buyei and Miao Autonomous Prefecture, Guizhou Province |
| 4-11 | Dawan Village, Panxin Town, Songtao County, Tongren City, Guizhou Province |
| 4-12 | Bing'an Village, Bing'an Township, Chishui City, Zunyi City, Guizhou Province |
| 4-13 | Hengzhang Village, Purong Town, Baojing County, Xiangxi Tujia and Miao Autonomous Prefecture, Hunan Province |
| 4-14 | Azhahe Village, Qianling Town, Baojing County, Xiangxi Tujia and Miao Autonomous Prefecture, Hunan Province |
| 4-15 | Fenghong Village, Shuitianhe Town, Baojing County, Xiangxi Tujia and Miao Autonomous Prefecture, Hunan Province |
| 4-16 | Kongping Village, Shuitianhe Town, Baojing County, Xiangxi Tujia and Miao Autonomous Prefecture, Hunan Province |
| 4-17 | Laodong Village, Machong Township, Fenghuang County, Xiangxi Tujia and Miao Autonomous Prefecture, Hunan Province |
| 4-18 | Dehang Village, Aizhai Town, Jishou City, Xiangxi Tujia and Miao Autonomous Prefecture, Hunan Province |
| 4-19 | Lanhuadong Village, Furong Town, Yongshun County, Xiangxi Tujia and Miao Autonomous Prefecture, Hunan Province |
| 4-20 | Tangjiaguan Village, Dongping Town, Anhua County, Yiyang City, Hunan Province |
| 4-21 | Shiyanping Village, Wangjiaping Town, Yongding District, Zhangjiajie City, Hunan Province |
| 4-22 | Yanpaixi Village, Gaofeng Township, Guzhang County, Xiangxi Tujia and Miao Autonomous Prefecture, Hunan Province |
| 4-23 | Xiaoxi Village, Xiaoxi Township, Yongshun County, Xiangxi Tujia and Miao Autonomous Prefecture, Hunan Province |
| 4-24 | Liuhe Village, Miao'ertan Town, Longshan County, Xiangxi Tujia and Miao Autonomous Prefecture, Hunan Province |
| 4-25 | Shuangfeng Village, Daba Township, Yongshun County, Xiangxi Tujia and Miao Autonomous Prefecture, Hunan Province |
| 4-26 | Hangsha Village, Hangsha Township, Baojing County, Xiangxi Tujia and Miao Autonomous Prefecture, Hunan Province |
| 4-27 | Changchun Village, Liye Town, Longshan County, Xiangxi Tujia and Miao Autonomous Prefecture, Hunan Province |
| 4-28 | Laozhai Village, Yantouzhai Town, Guzhang County, Xiangxi Tujia and Miao Autonomous Prefecture, Hunan Province |
| 4-29 | Xinzhaiping Village, Tanxi Town, Luxi County, Xiangxi Tujia and Miao Autonomous Prefecture, Hunan Province |
| 4-30 | Zhangjiaping Village, Xixi Town, Luxi County, Xiangxi Tujia and Miao Autonomous Prefecture, Hunan Province |
| 4-31 | Shawan Village, Wanmipo Town, Baojing County, Xiangxi Tujia and Miao Autonomous Prefecture, Hunan Province |
| 4-32 | Baidong Village, Shidong Town, Tianzhu County, Qiandongnan Prefecture, Guizhou Province |
| 4-33 | Dongtian Village, Sirong Township, Rongshui Miao Autonomous County, Liuzhou City, Guangxi Zhuang Autonomous Region |
| 4-34 | Gaoyou Village, Linxi Town, Sanjiang Dong Autonomous County, Liuzhou City, Guangxi Zhuang Autonomous Region |
| 4-35 | Liangshuang Village, Hongshui Township, Rongshui Miao Autonomous County, Liuzhou City, Guangxi Zhuang Autonomous Region |
| 4-36 | Rongdi Village, Sirong Township, Rongshui Miao Autonomous County, Liuzhou City, Guangxi Zhuang Autonomous Region |
| 4-37 | Guidatun, Bajiang Town, Sanjiang Dong Autonomous County, Liuzhou City, Guangxi Zhuang Autonomous Region |
| 4-38 | Gaolu Village, Yangxi Township, Sanjiang Dong Autonomous County, Liuzhou City, Guangxi Zhuang Autonomous Region |
| 4-39 | Guandong Village, Linxi Town, Sanjiang Dong Autonomous County, Liuzhou City, Guangxi Zhuang Autonomous Region |
| 4-40 | Laoba Village, Laobao Township, Sanjiang Dong Autonomous County, Liuzhou City, Guangxi Zhuang Autonomous Region |
| 5-1 | Suzhuang Village, Hexi Town, Gaoping City, Jincheng City, Shanxi Province |
| 5-2 | Mixi Village, Mishan Town, Gaoping City, Jincheng City, Shanxi Province |
| 5-3 | Shangzhuang Village, Runcheng Town, Yangcheng County, Jincheng City, Shanxi Province |
| 5-4 | Xihuangshi Village, Beiyicheng Town, Zezhou County, Jincheng City, Shanxi Province |
| 5-5 | Dongjie Village, Dayang Town, Zezhou County, Jincheng City, Shanxi Province |
| 5-6 | Zhoucun Village, Zhoucun Town, Zezhou County, Jincheng City, Shanxi Province |
| 5-7 | Huihuang Village, Liyang Town, Heshun County, Jinzhong City, Shanxi Province |
| 5-8 | Tian Village, Yitang Town, Jiexiu City, Jinzhong City, Shanxi Province |
| 5-9 | Nanjia Village, Zhanglan Town, Jiexiu City, Jinzhong City, Shanxi Province |
| 5-10 | Jingsheng Village, Jingsheng Town, Lingshi County, Jinzhong City, Shanxi Province |
| 5-11 | Dongjialing Village, Nanguan Town, Lingshi County, Jinzhong City, Shanxi Province |
| 5-12 | Xiamen Village, Xiamen Town, Lingshi County, Jinzhong City, Shanxi Province |
| 5-13 | Zhaojiahe Village, Yongping Town, Yanchuan County, Yan'an City, Shaanxi Province |
| 5-14 | Majiawan Village, Moyigou Village, Jiajiaping Town, Yanchuan County, Yan'an City, Shaanxi Province |
| 5-15 | Tianjiachuan Village, Jiajiaping Town, Yanchuan County, Yan'an City, Shaanxi Province |
| 5-16 | Zhenjiawan Village, Guanzhuang Town, Yanchuan County, Yan'an City, Shaanxi Province |
| 5-17 | Baishe Village, Xinxing Town, Sanyuan County, Xianyang City, Shaanxi Province |
| 5-18 | Taixiangsi Village, Guanzhuang Town, Yanchuan County, Yan'an City, Shaanxi Province |
| 5-19 | Nianpan Village, Qiankunwan Town, Yanchuan County, Yan'an City, Shaanxi Province |
| 5-20 | Yangjiagou Village, Yangjiagou Town, Mizhi County, Yulin City, Shaanxi Province |
| 5-21 | Liujiashan Village, Qiankunwan Town, Yanchuan County, Yan'an City |
| 5-22 | Huihuang Village, Liyang Town, Heshun County, Jinzhong City, Shanxi Province |
| 5-23 | Dongjialing Village, Nanguan Town, Lingshi County, Jinzhong City, Shanxi Province |
| 5-24 | Zhao Village, Dongquan Town, Pingyao County, Jinzhong City, Shanxi Province |
| 5-25 | Duan Village, Duancun Town, Pingyao County, Jinzhong City, Shanxi Province |
| 5-26 | Pudong Village, Duancun Town, Pingyao County, Jinzhong City, Shanxi Province |
| 5-27 | Liang Village, Yuebi Township, Pingyao County, Jinzhong City, Shanxi Province |
| 5-28 | Gulian Village, Jialing Town, Qi County, Jinzhong City, Shanxi Province |
| 5-29 | Pantuo Village, Laiyuan Town, Qi County, Jinzhong City, Shanxi Province |
| 5-30 | Caijiazhuang Village, Zaolin Township, Lishi District, Lüliang City, Shanxi Province |
| 5-31 | Xiwan Village, Qikou Town, Lin County, Lüliang City, Shanxi Province |
| 5-32 | Yaotou Village, Yaotou Town, Chengcheng County, Weinan City, Shaanxi Province |
| 5-33 | Aijiagou Village, Sishipu Town, Suide County, Yulin City, Shaanxi Province |
| 5-34 | Changjiagou Village, Mantangchuan Town, Suide County, Yulin City, Shaanxi Province |
| 5-35 | Guojiagou Village, Mantangchuan Town, Suide County, Yulin City, Shaanxi Province |
| 5-36 | Yukou Village, Jiazhou Sub-district Office, Jia County, Yulin City, Shaanxi Province |
| 5-37 | Gaomiaoshan Village, Yinzhou Sub-district Office, Mizhi County, Yulin City, Shaanxi Province |
| 5-38 | Sigou Village, Yangjiagou Town, Mizhi County, Yulin City, Shaanxi Province |
| 5-39 | Yuejiacha Village, Yangjiagou Town, Mizhi County, Yulin City, Shaanxi Province |
| 5-40 | Liujiamao Village, Yindou Town, Mizhi County, Yulin City, Shaanxi Province |
